# Supplementary material
Source: MDPI journal article supplement (https://www.mdpi.com/2072-4292/11/12/1442)
Supplement: s1 [file s1]

**Table S1.** Sampling (in pixels count) used for land use / land cover classification in the Mogtedo region, Burkina Faso

|                              | Bare soil | Hydromorphic soil | Irrigated areas | Rainfed areas | Water bodies | Total |
|------------------------------|-----------|-------------------|-----------------|---------------|--------------|-------|
| <b>Landsat-5 TM (1987)</b>   | 1348      | 398               | 382             | 656           | 246          | 3030  |
| <b>Landsat-7 ETM+ (2000)</b> | 1348      | 384               | 570             | 656           | 246          | 3204  |
| <b>Landsat-8 OLI (2015)</b>  | 1348      | 384               | 570             | 656           | 246          | 3204  |

**Table S2.** Matrix of LULC changes between the time intervals 1987-2000 and 2000-2015 across the Mogtiedo region, Burkina Faso. Data are expressed in percentage of the map. The main diagonal of the matrix represents the Persistence, and the changes are data off the main diagonal.

|      |                   | 2000      |                   |                 |               |              |            |       |
|------|-------------------|-----------|-------------------|-----------------|---------------|--------------|------------|-------|
|      |                   | Bare soil | Hydromorphic soil | Irrigated areas | Rainfed areas | Water bodies | Total 1987 | Loss  |
| 1987 | Bare soil         | 49.341    | 0                 | 0.273           | 5.585         | 0            | 55.199     | 5.857 |
|      | Hydromorphic soil | 0         | 24.654            | 0               | 0             | 0            | 24.654     | 0     |
|      | Irrigated areas   | 0         | 0                 | 3.282           | 0             | 0            | 3.282      | 0     |
|      | Rainfed areas     | 0         | 0                 | 0.239           | 14.555        | 0            | 14.794     | 0.239 |
|      | Water bodies      | 0         | 0.085             | 0.067           | 0             | 1.920        | 2.071      | 0.151 |
|      | Total 2000        | 49.341    | 24.739            | 3.860           | 20.140        | 1.920        | 100        | 6.247 |
|      | Gain              | 0         | 0.085             | 0.578           | 5.585         | 0            | 6.247      |       |
|      |                   | Bare soil | Hydromorphic soil | Irrigated areas | Rainfed areas | Water bodies | Total 2015 | Gain  |
| 2015 | Bare soil         | 44.195    | 0                 | 0               | 0             | 0            | 44.195     | 0     |
|      | Hydromorphic soil | 0         | 24.735            | 0               | 0             | 0.351        | 25.086     | 0.351 |
|      | Irrigated areas   | 0.760     | 0                 | 3.860           | 0.414         | 0            | 5.038      | 1.178 |
|      | Rainfed areas     | 4.386     | 0                 | 0               | 19.726        | 0            | 24.112     | 4.386 |
|      | Water bodies      | 0         | 0                 | 0               | 0             | 1.568        | 1.568      | 0     |
|      | Total 2000        | 49.341    | 24.739            | 3.860           | 20.140        | 1.920        | 100        | 5.916 |
|      | Loss              | 5.146     | 0                 | 0               | 0.414         | 0.351        | 5.916      |       |

**Table S3.** Matrix of LULC changes between the time interval 1987-2015 across the Mogtedo region, Burkina Faso. Data are expressed in percentage of the map. The main diagonal of the matrix represents the persistence, and the changes are data off the main diagonal.

|      |                   | 1987      |                   |                 |               |              |               |               |
|------|-------------------|-----------|-------------------|-----------------|---------------|--------------|---------------|---------------|
|      |                   | Bare soil | Hydromorphic soil | Irrigated areas | Rainfed areas | Water bodies | Total 2015    | Gain          |
| 2015 | Bare soil         | 44.195    | 0                 | 0               | 0             | 0            | 44.195        | 0             |
|      | Hydromorphic soil | 0         | 24.654            | 0               | 0             | 0.432        | 25.086        | 0.432         |
|      | Irrigated areas   | 1.033     | 0                 | 3.282           | 0.653         | 0.070        | 5.038         | 1.756         |
|      | Rainfed areas     | 9.971     | 0                 | 0               | 14.141        | 0            | 24.112        | 9.971         |
|      | Water bodies      | 0         | 0                 | 0               | 0             | 1.568        | 1.568         | 0             |
|      | <b>Total 1987</b> | 55.199    | 24.654            | 3.282           | 14.794        | 2.071        | 100           | <b>12.159</b> |
|      | <b>Loss</b>       | 11.004    | 0                 | 0               | 0.653         | 0.503        | <b>12.159</b> |               |
